# Supplementary material for: Brain Abnormalities in Individuals with a Desire for a Healthy Limb Amputation: Somatosensory, Motoric or Both? A Task-Based fMRI Verdict
Source: MDPI journal article supplement (doi:10.3390/brainsci11091248), 2021-09-21
Supplement: s1 [file s1]

**Table S1: Tactile stimulation task.** MNI coordinates of the brain regions active in subjects with BID and controls during the tactile stimulation of the hands and feet. Brain region (R = right hemisphere; L = left hemisphere), cluster size (k = number of voxels), cluster-wise FWER-corrected p-value and uncorrected p-value, voxel-wise (peak level) Z-score and Montreal Neurological Institute (MNI) coordinate are reported. Only voxels that survived the cluster-wise  $p < 0.05$  FWER corrected threshold are reported. #Statistical threshold  $p < 0.05$  whole-brain FWER-corrected voxelwise. The local maxima of significant clusters are reported in MNI coordinates. BA= Brodmann Areas; corr = corrected. \*\*labelled as no region in the AAL template and identified using the Neuromorphometrics and the HarvardOxford atlas.

| Brain region (BA)          | Cluster |                        |                          | Z-score | Peak            |     |     |
|----------------------------|---------|------------------------|--------------------------|---------|-----------------|-----|-----|
|                            | K       | P <sub>FWER-corr</sub> | P <sub>uncorrected</sub> |         | MNI coordinates |     |     |
|                            |         |                        |                          |         | x               | y   | z   |
| 1. CONTROLS                |         |                        |                          |         |                 |     |     |
| A. Right hand              |         |                        |                          |         |                 |     |     |
| Cluster 1                  | 9948    | <0.001                 | <0.001                   |         |                 |     |     |
| L Postcentral gyrus (3)    |         |                        |                          | Inf#    | -48             | -26 | 56  |
| L Rolandic opercular gyrus |         |                        |                          | Inf#    | -50             | -20 | 18  |
| L SMA                      |         |                        |                          | 5.93#   | -6              | -8  | 50  |
| Cluster 2                  | 754     | 0.005                  | 0.002                    |         |                 |     |     |
| R Cerebellum               |         |                        |                          | 6.97#   | 22              | -52 | -26 |
| Cluster 3                  | 2646    | <0.001                 | <0.001                   |         |                 |     |     |
| R Rolandic opercular gyrus |         |                        |                          | 6.23#   | 58              | -18 | 20  |
| R Supramarginal gyrus (43) |         |                        |                          | 5.32#   | 62              | -20 | 36  |
| R Inf. parietal gyrus (2)  |         |                        |                          | 4.51#   | 50              | -34 | 54  |
| Cluster 4                  | 482     | 0.028                  | 0.009                    |         |                 |     |     |
| R Mid. temporal gyrus (37) |         |                        |                          | 5.09#   | 54              | -58 | 0   |
| Cluster 5                  | 801     | 0.004                  | 0.001                    |         |                 |     |     |
| R Insula                   |         |                        |                          | 4.52#   | 42              | 0   | 10  |
| R Insula                   |         |                        |                          | 4.48#   | 44              | 2   | 0   |
| R Rolandic opercular gyrus |         |                        |                          | 3.95    | 54              | 10  | 4   |
| B. Left hand               |         |                        |                          |         |                 |     |     |
| Cluster 1                  | 7123    | <0.001                 | <0.001                   |         |                 |     |     |
| R Postcentral gyrus (4)    |         |                        |                          | Inf#    | 40              | -24 | 54  |
| R Rolandic opercular gyrus |         |                        |                          | Inf#    | 52              | -18 | 18  |
| R Insula                   |         |                        |                          | 4.87#   | 42              | -2  | 8   |
| Cluster 2                  | 826     | 0.004                  | 0.001                    |         |                 |     |     |
| L Cerebellum               |         |                        |                          | Inf#    | -20             | -52 | -26 |
| Cluster 3                  | 1972    | <0.001                 | <0.001                   |         |                 |     |     |
| L Supramarginal gyrus (3)  |         |                        |                          | 5.52#   | -58             | -22 | 40  |
| L Postcentral gyrus        |         |                        |                          | 5.31#   | -52             | -18 | 16  |
| L Supramarginal gyrus      |         |                        |                          | 4.97#   | -54             | -26 | 22  |
| C. Right foot              |         |                        |                          |         |                 |     |     |
| Cluster 1                  | 962     | 0.002                  | 0.001                    |         |                 |     |     |
| L Precuneus (5)            |         |                        |                          | 6.59#   | -12             | -44 | 64  |
| L Paracentral lobule       |         |                        |                          | 6.01#   | -6              | -36 | 62  |

|                             |             |                  |                  |       |     |     |     |
|-----------------------------|-------------|------------------|------------------|-------|-----|-----|-----|
| L Paracentral lobule (6)    |             |                  |                  | 4.51# | -8  | -14 | 68  |
| <b>Cluster 2</b>            | <b>1801</b> | <b>&lt;0.001</b> | <b>&lt;0.001</b> |       |     |     |     |
| L Sup. temporal gyrus       |             |                  |                  | 6.13# | -50 | -28 | 20  |
| L Heschl gyrus              |             |                  |                  | 5.53# | -34 | -22 | 14  |
| L Supramarginal gyrus (2)   |             |                  |                  | 5.34# | -60 | -24 | 40  |
| <b>Cluster 3</b>            | <b>741</b>  | <b>0.006</b>     | <b>0.002</b>     |       |     |     |     |
| R Rolandic opercular gyrus  |             |                  |                  | 4.94# | 48  | -28 | 22  |
| <b>C. Left foot</b>         |             |                  |                  |       |     |     |     |
| <b>Cluster 1</b>            | <b>1387</b> | <b>&lt;0.001</b> | <b>&lt;0.001</b> |       |     |     |     |
| R Postcentral gyrus (5)     |             |                  |                  | Inf#  | 14  | -42 | 68  |
| <b>Cluster 2</b>            | <b>3538</b> | <b>&lt;0.001</b> | <b>&lt;0.001</b> |       |     |     |     |
| R Sup. temporal gyrus       |             |                  |                  | 7.74# | 50  | -30 | 20  |
| R Rolandic opercular gyrus  |             |                  |                  | 7.07# | 56  | -20 | 18  |
| R Postcentral gyrus (43)    |             |                  |                  | 4.96# | 62  | -16 | 36  |
| <b>Cluster 3</b>            | <b>2021</b> | <b>&lt;0.001</b> | <b>&lt;0.001</b> |       |     |     |     |
| L Supramarginal gyrus       |             |                  |                  | 6.48# | -52 | -26 | 20  |
| L Supramarginal gyrus (43)  |             |                  |                  | 4.29# | -60 | -20 | 36  |
| L Rolandic opercular gyrus  |             |                  |                  | 4.17  | -44 | -4  | 16  |
| <b>2. BID</b>               |             |                  |                  |       |     |     |     |
| <b>A. Right hand</b>        |             |                  |                  |       |     |     |     |
| <b>Cluster 1</b>            | <b>2671</b> | <b>&lt;0.001</b> | <b>&lt;0.001</b> |       |     |     |     |
| L Postcentral gyrus (3)     |             |                  |                  | Inf#  | -38 | -24 | 52  |
| <b>Cluster 2</b>            | <b>468</b>  | <b>0.030</b>     | <b>0.009</b>     |       |     |     |     |
| R Cerebellum                |             |                  |                  | 5.88# | 24  | -52 | -26 |
| <b>B. Left hand</b>         |             |                  |                  |       |     |     |     |
| <b>Cluster 1</b>            | <b>2581</b> | <b>&lt;0.001</b> | <b>&lt;0.001</b> |       |     |     |     |
| R Postcentral gyrus (4)     |             |                  |                  | Inf#  | 38  | -26 | 56  |
| R Precentral gyrus (6)      |             |                  |                  | 7.53# | 38  | -14 | 62  |
| <b>C. Right foot</b>        |             |                  |                  |       |     |     |     |
| <b>Cluster 1</b>            | <b>1437</b> | <b>&lt;0.001</b> | <b>&lt;0.001</b> |       |     |     |     |
| L Paracentral lobule        |             |                  |                  | Inf#  | -6  | -32 | 62  |
| L Precuneus (4)             |             |                  |                  | Inf#  | -14 | -40 | 66  |
| <b>Cluster 2</b>            | <b>797</b>  | <b>0.004</b>     | <b>0.001</b>     |       |     |     |     |
| L Sup. temporal gyrus       |             |                  |                  | 4.90# | -46 | -30 | 18  |
| L Parietal operculum** (41) |             |                  |                  | 4.56# | -40 | -38 | 22  |
| L Parietal operculum**      |             |                  |                  | 3.45  | -26 | -22 | 20  |
| <b>C. Left foot</b>         |             |                  |                  |       |     |     |     |
| <b>Cluster 1</b>            | <b>1017</b> | <b>&lt;0.001</b> | <b>&lt;0.001</b> |       |     |     |     |
| R Postcentral gyrus (4)     |             |                  |                  | 7.71# | 12  | -40 | 66  |
| R Paracentral lobule (4)    |             |                  |                  | 7.09# | 6   | -30 | 62  |
| <b>Cluster 2</b>            | <b>1096</b> | <b>0.001</b>     | <b>&lt;0.001</b> |       |     |     |     |
| R Sup. temporal gyrus       |             |                  |                  | 6.63# | 48  | -30 | 22  |
| R Insula**                  |             |                  |                  | 4.03  | 32  | -24 | 16  |
