# Supplementary material for: Brain Abnormalities in Individuals with a Desire for a Healthy Limb Amputation: Somatosensory, Motoric or Both? A Task-Based fMRI Verdict
Source: MDPI journal article supplement (doi:10.3390/brainsci11091248), 2021-09-21
Supplement: s1 [file s1]

**Table S2: Motor execution task.** MNI coordinates of the brain regions active in subjects with controls and individuals with BID during the movement of hands and feet. Brain region (R = right hemisphere; L = left hemisphere), cluster size (k = number of voxels), cluster-wise FWER-corrected p-value and uncorrected p-value, voxel-wise (peak level) Z-score and Montreal Neurological Institute (MNI) coordinate are reported. Only voxels that survived the cluster-wise  $p < 0.05$  FWER corrected threshold are reported. #Statistical threshold  $p < 0.05$  whole-brain FWER-corrected voxelwise. The local maxima of significant clusters are reported in MNI coordinates. BA= Brodmann Areas; corr = corrected. \*\*labelled as no region in the AAL template and identified using the Neuromorphometrics or the HarvardOxford atlas.

| Brain region (BA)           | cluster- level |                        |                          | Z-score | voxel-level     |     |     |
|-----------------------------|----------------|------------------------|--------------------------|---------|-----------------|-----|-----|
|                             | K <sub>E</sub> | P <sub>FWER corr</sub> | P <sub>uncorrected</sub> |         | MNI coordinates |     |     |
|                             |                |                        |                          |         | x               | y   | z   |
| 1. CONTROLS                 |                |                        |                          |         |                 |     |     |
| A. Right hand               |                |                        |                          |         |                 |     |     |
| Cluster 1                   | 16222          | <0.001                 | <0.001                   |         |                 |     |     |
| L Postcentral gyrus (3)     |                |                        |                          | Inf#    | -36             | -22 | 52  |
| L Precentral gyrus (6)      |                |                        |                          | Inf#    | -32             | -16 | 60  |
| L SMA (6)                   |                |                        |                          | 7.56#   | -4              | -6  | 54  |
| Cluster 2                   | 3862           | <0.001                 | <0.001                   |         |                 |     |     |
| R Cerebellum                |                |                        |                          | Inf#    | 12              | -54 | -18 |
| R Cerebellum                |                |                        |                          | 6.92#   | 14              | -64 | -48 |
| L Cerebellum                |                |                        |                          | 5.31#   | -28             | -54 | -28 |
| Cluster 3                   | 3065           | <0.001                 | <0.001                   |         |                 |     |     |
| R Supramarginal gyrus (2)   |                |                        |                          | 5.82#   | 44              | -32 | 44  |
| R Supramarginal gyrus       |                |                        |                          | 4.55#   | 62              | -16 | 22  |
| R Sup. parietal gyrus (7)   |                |                        |                          | 4.22    | 32              | -56 | 56  |
| Cluster 4                   | 643            | 0.006                  | 0.002                    |         |                 |     |     |
| R Inf. temporal gyrus (21)  |                |                        |                          | 4.69#   | 54              | -52 | -4  |
| R Mid temporal gyrus (21)** |                |                        |                          | 4.43    | 48              | -50 | 2   |
| B. Left Hand                |                |                        |                          |         |                 |     |     |
| Cluster 1                   | 14434          | <0.001                 | <0.001                   |         |                 |     |     |
| R Precentral gyrus (4)      |                |                        |                          | Inf#    | 38              | -18 | 54  |
| R SMA (6)                   |                |                        |                          | 7.46#   | 2               | -4  | 56  |
| L Precentral gyrus (6)      |                |                        |                          | 6.99#   | -32             | -12 | 58  |
| Cluster 2                   | 2963           | <0.001                 | <0.001                   |         |                 |     |     |
| L Cerebellum                |                |                        |                          | Inf#    | -16             | -54 | -22 |
| R Cerebellum                |                |                        |                          | 5.66#   | 24              | -54 | -24 |
| Cluster 3                   | 1604           | <0.001                 | <0.001                   |         |                 |     |     |
| R Pallidum                  |                |                        |                          | 5.53#   | 28              | -2  | -4  |
| R Precentral gyrus (6)      |                |                        |                          | 5.15#   | 60              | 8   | 30  |
| R Thalamus                  |                |                        |                          | 4.54#   | 16              | -20 | 4   |
| C. Right foot               |                |                        |                          |         |                 |     |     |
| Cluster 1                   | 26312          | <0.001                 | <0.001                   |         |                 |     |     |

|                           |              |                  |                  |       |     |     |     |
|---------------------------|--------------|------------------|------------------|-------|-----|-----|-----|
| L Paracentral lobule (4)  |              |                  |                  | Inf#  | -6  | -28 | 62  |
| L Paracentral lobule (4)  |              |                  |                  | Inf#  | -8  | -20 | 68  |
| L Precuneus               |              |                  |                  | Inf#  | -6  | -38 | 62  |
| <b>Cluster 2</b>          | <b>868</b>   | <b>0.001</b>     | <b>&lt;0.001</b> |       |     |     |     |
| R Vermis                  |              |                  |                  | 6.58# | 4   | -48 | -18 |
| R Cerebellum**            |              |                  |                  | 6.52# | 12  | -42 | -26 |
| L Cerebellum              |              |                  |                  | 3.44  | -8  | -32 | -16 |
| <b>C. Right foot</b>      |              |                  |                  |       |     |     |     |
| <b>Cluster 1</b>          | <b>26312</b> | <b>&lt;0.001</b> | <b>&lt;0.001</b> |       |     |     |     |
| L Paracentral lobule (4)  |              |                  |                  | Inf#  | -6  | -28 | 62  |
| L Paracentral lobule (4)  |              |                  |                  | Inf#  | -8  | -20 | 68  |
| L Precuneus               |              |                  |                  | Inf#  | -6  | -38 | 62  |
| <b>Cluster 2</b>          | <b>868</b>   | <b>0.001</b>     | <b>&lt;0.001</b> |       |     |     |     |
| R Vermis                  |              |                  |                  | 6.58# | 4   | -48 | -18 |
| R Cerebellum**            |              |                  |                  | 6.52# | 12  | -42 | -26 |
| L Cerebellum              |              |                  |                  | 3.44  | -8  | -32 | -16 |
| <b>2. BID</b>             |              |                  |                  |       |     |     |     |
| <b>A. Right hand</b>      |              |                  |                  |       |     |     |     |
| <b>Cluster 1</b>          | <b>22527</b> | <b>&lt;0.001</b> | <b>&lt;0.001</b> |       |     |     |     |
| L Precentral gyrus (6)    |              |                  |                  | Inf#  | -32 | -14 | 60  |
| L Postcentral gyrus (4)   |              |                  |                  | Inf#  | -36 | -24 | 54  |
| L Inf. parietal gyrus (3) |              |                  |                  | 7.35# | -48 | -24 | 48  |
| <b>Cluster 2</b>          | <b>5753</b>  | <b>&lt;0.001</b> | <b>&lt;0.001</b> |       |     |     |     |
| R Cerebellum (19)         |              |                  |                  | 7.41# | 12  | -54 | -18 |
| R Cerebellum (37)         |              |                  |                  | 7.35# | 24  | -52 | -24 |
| L Cerebellum (19)         |              |                  |                  | 5.37# | -18 | -64 | -26 |
| <b>Cluster 3</b>          | <b>5214</b>  | <b>&lt;0.001</b> | <b>&lt;0.001</b> |       |     |     |     |
| R Supramarginal gyrus (3) |              |                  |                  | 6.04# | 52  | -24 | 40  |
| R Mid temporal gyrus**    |              |                  |                  | 4.75# | 46  | -30 | -8  |
| R Sup. parietal gyrus (7) |              |                  |                  | 4.39  | 24  | -68 | 50  |
| <b>B. Left hand</b>       |              |                  |                  |       |     |     |     |
| <b>Cluster 1</b>          | <b>17900</b> | <b>&lt;0.001</b> | <b>&lt;0.001</b> |       |     |     |     |
| R Precentral gyrus (4)    |              |                  |                  | Inf#  | 36  | -18 | 54  |
| R Postcentral gyrus (3)   |              |                  |                  | Inf#  | 36  | -32 | 58  |
| R Postcentral gyrus (3)   |              |                  |                  | Inf#  | 52  | -20 | 42  |
| <b>Cluster 2</b>          | <b>3899</b>  | <b>&lt;0.001</b> | <b>&lt;0.001</b> |       |     |     |     |
| L Cerebellum (37)         |              |                  |                  | Inf#  | -18 | -54 | -24 |
| L Cerebellum              |              |                  |                  | 5.49# | -10 | -68 | -44 |
| R Cerebellum              |              |                  |                  | 5.45# | 26  | -56 | -26 |
| <b>Cluster 3</b>          | <b>4763</b>  | <b>&lt;0.001</b> | <b>&lt;0.001</b> |       |     |     |     |
| L Precentral gyrus (6)    |              |                  |                  | 5.74# | -56 | 4   | 30  |
| L Postcentral gyrus       |              |                  |                  | 5.56# | -54 | -18 | 30  |
| L Supramarginal gyrus (2) |              |                  |                  | 5.41# | -48 | -30 | 36  |
| <b>C. Right foot</b>      |              |                  |                  |       |     |     |     |

|                                 |             |                  |                  |       |     |     |     |
|---------------------------------|-------------|------------------|------------------|-------|-----|-----|-----|
| <b>Cluster 1</b>                | <b>3901</b> | <b>&lt;0.001</b> | <b>&lt;0.001</b> |       |     |     |     |
| L Paracentral lobule (4)        |             |                  |                  | Inf#  | -4  | -28 | 62  |
| L Paracentral lobule (6)        |             |                  |                  | 6.74# | -8  | -14 | 66  |
| R SMA                           |             |                  |                  | 5.38# | 2   | -4  | 62  |
| <b>Cluster 2</b>                | <b>444</b>  | <b>0.025</b>     | <b>0.007</b>     |       |     |     |     |
| R Cerebellum**                  |             |                  |                  | 5.38# | 12  | -42 | -26 |
| R Vermis                        |             |                  |                  | 4.50# | 6   | -48 | -18 |
| <b>Cluster 3</b>                | <b>2701</b> | <b>&lt;0.001</b> | <b>&lt;0.001</b> |       |     |     |     |
| R Sup. temporal pole (38)       |             |                  |                  | 5.31# | 60  | 8   | -2  |
| R Insula                        |             |                  |                  | 4.33  | 48  | 6   | 4   |
| R Rolandic opercular gyrus (22) |             |                  |                  | 4.24  | 62  | -18 | 16  |
| <b>Cluster 4</b>                | <b>5110</b> | <b>&lt;0.001</b> | <b>&lt;0.001</b> |       |     |     |     |
| L Putamen                       |             |                  |                  | 4.63# | -26 | -10 | 8   |
| L Sup. temporal gyrus (41)      |             |                  |                  | 4.60# | -50 | -32 | 18  |
| L Thalamus                      |             |                  |                  | 4.50# | -18 | -18 | 6   |
| <b>D. Left foot</b>             |             |                  |                  |       |     |     |     |
| <b>Cluster 1</b>                | <b>1777</b> | <b>&lt;0.001</b> | <b>&lt;0.001</b> |       |     |     |     |
| R Paracentral lobule (4)        |             |                  |                  | 7.00# | 6   | -28 | 64  |
| <b>Cluster 2</b>                | <b>1049</b> | <b>&lt;0.001</b> | <b>&lt;0.001</b> |       |     |     |     |
| R Supramarginal gyrus           |             |                  |                  | 4.91# | 50  | -30 | 24  |
| <b>Cluster 3</b>                | <b>337</b>  | <b>0.057</b>     | <b>0.015</b>     |       |     |     |     |
| R Sup. temporal pole (38)       |             |                  |                  | 4.30  | 60  | 8   | -2  |
| <b>Custer 4</b>                 | <b>225</b>  | <b>0.145</b>     | <b>0.041</b>     |       |     |     |     |
| R Caudate                       |             |                  |                  | 4.20  | 16  | -8  | 20  |
| <b>Cluster 5</b>                | <b>576</b>  | <b>0.010</b>     | <b>0.003</b>     |       |     |     |     |
| R Pallidum                      |             |                  |                  | 3.94  | 26  | 0   | 0   |
| R Thalamus**                    |             |                  |                  | 3.35  | 8   | 0   | 6   |
